# Supplementary material for: Protective effects of triptolide against oxidative stress in retinal pigment epithelium cells via the PI3K/AKT/Nrf2 pathway: a network pharmacological method and experimental validation
Source: publisher site journal article supplement (doi:10.18632/aging.205570), 2024-02-21
Supplement: Supplementary file [file aging-v16i4-205570-supplementary-material-SD1.pdf]

SUPPLEMENTARY FIGURE

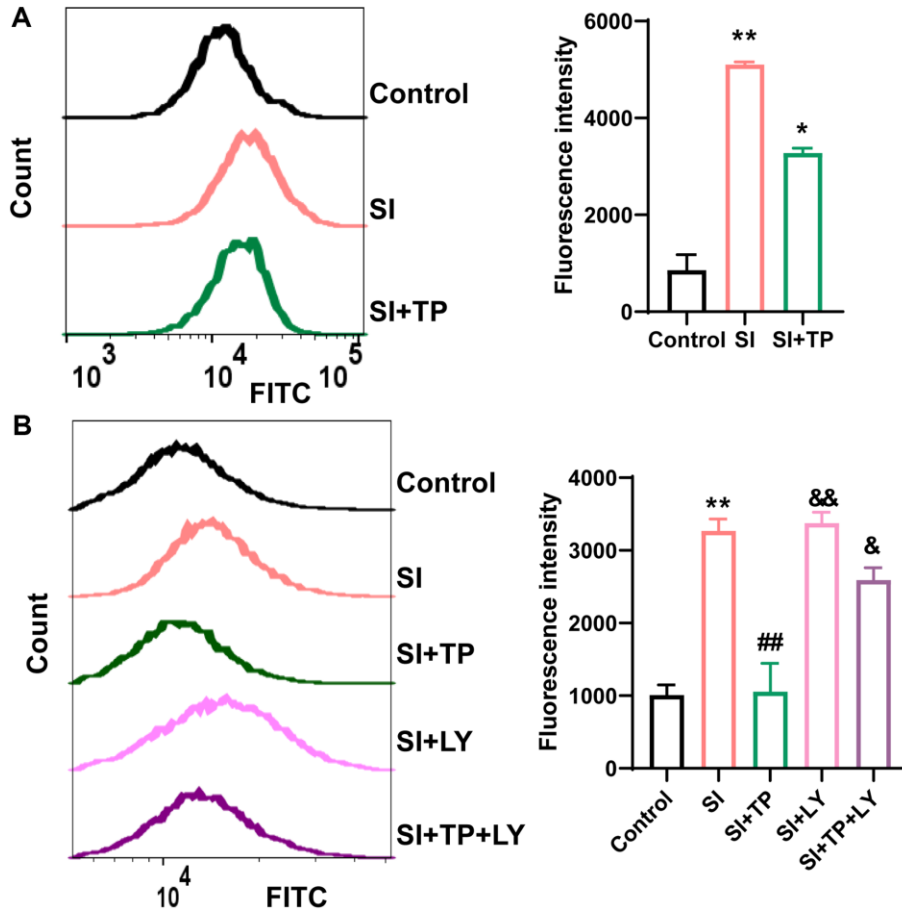

**Supplementary Figure 1. TP had a rescue effect on the increased ROS caused by SI, and LY294002 (LY) reversed this rescue effect.** After pretreatment with TP (20 nM) for 6 h (A), the cells were incubated with LY294002 (10 μM) for 1 h or not (B), then exposed to SI (10 mM) for 24 h. And the cells were stained with DCFH-DA to detect the intracellular ROS production by flow cytometry. Quantitative analyses by ImageJ software ( $n = 3$ ). Data are shown as mean ± standard deviation (SD) ( $n = 3$ ); \* $p < 0.05$ , \*\* $P < 0.01$  compared with the control group; ## $P < 0.01$  compared with the SI group; & $P < 0.05$ , && $P < 0.01$  compared with the SI+TP group.
